# Supplementary material
Source: PubMed Central journal article supplement (PMC9083341)
Supplement: NIHMS1799936-supplement-Supp_FIle.pdf [file NIHMS1799936-supplement-Supp_FIle.pdf]

**Supplementary information**

---

**The *MYC* oncogene – the grand orchestrator of cancer growth and immune evasion**

---

In the format provided by the authors and unedited

**Supplementary Table 1 | Approaches currently evaluated in clinical trials to target MYC or MYC synthetic lethal interactions**

| Mechanism                                                                                                             | Drug                    | Combination                                                | Trial phase | Trial number <sup>a</sup> | Status <sup>b</sup>    |                        |
|-----------------------------------------------------------------------------------------------------------------------|-------------------------|------------------------------------------------------------|-------------|---------------------------|------------------------|------------------------|
| Inhibition of MYC transcriptional activity                                                                            |                         |                                                            |             |                           |                        |                        |
| Dominant negative inhibition of MYC–MAX dimerization and MYC–DNA binding                                              | Omo-103                 | N/A                                                        | I/II        | NCT04808362               | Not yet recruiting     |                        |
| Silencing of MYC gene expression                                                                                      |                         |                                                            |             |                           |                        |                        |
| Prevention of bromodomain and extra-terminal motif (BET) proteins interaction with histones and transcription factors | Pelabresib              | Ruxolitinib                                                | III         | NCT04603495               | Recruiting             |                        |
|                                                                                                                       | ZEN-3694                | Enzalutamide, pembrolizumab                                | II          | NCT04471974               | Recruiting             |                        |
|                                                                                                                       |                         | Talazoparib                                                | II          | NCT03901469               | Recruiting             |                        |
|                                                                                                                       | BMS-986158              | Nivolumab                                                  | I/II        | NCT02419417               | Active, Not recruiting |                        |
|                                                                                                                       | CC-90010                | Temozolomide                                               | I/II        | NCT04324840               | Recruiting             |                        |
|                                                                                                                       |                         | N/A                                                        | I/II        | NCT04047303               | Active, Not recruiting |                        |
|                                                                                                                       |                         | Standard platinum-based chemotherapy, etoposide, nivolumab | I/II        | NCT03850067               | Recruiting             |                        |
|                                                                                                                       | ABBV-744                | Navitoclax, ruxolitinib                                    | I           | NCT04454658               | Recruiting             |                        |
|                                                                                                                       | BI 894999               | N/A                                                        | I           | NCT02516553               | Recruiting             |                        |
| Mivebresib                                                                                                            | Navitoclax, ruxolitinib | I                                                          | NCT04480086 | Recruiting                |                        |                        |
| PLX51107                                                                                                              | Azacitidine             | I                                                          | NCT04022785 | Recruiting                |                        |                        |
| Stabilizes G4 quadruplexes                                                                                            | APTO-253                | N/A                                                        | I           | NCT02267863               | Recruiting             |                        |
|                                                                                                                       | CX5461                  | N/A                                                        | I           | NCT02719977               | Active, Not recruiting |                        |
| Inhibiting MYC protein biosynthesis                                                                                   |                         |                                                            |             |                           |                        |                        |
| Inhibitors of the mechanistic target of rapamycin (mTOR) pathway                                                      | Everolimus              | STZ-5FU                                                    | III         | NCT02246127               | Recruiting             |                        |
|                                                                                                                       | Paxalisib               | N/A                                                        | II/III      | NCT03970447               | Recruiting             |                        |
|                                                                                                                       | ATG-008                 | N/A                                                        | II          | NCT03591965               | Recruiting             |                        |
|                                                                                                                       | Gedatolisib             | Trastuzumab biosimilars                                    | II          | NCT03698383               | Recruiting             |                        |
|                                                                                                                       | Samotolisib             | Prexasertib                                                |             | II                        | NCT04032080            | Recruiting             |
|                                                                                                                       |                         | N/A                                                        |             | II                        | NCT03213678            | Recruiting             |
|                                                                                                                       |                         | N/A                                                        |             | II                        | NCT03155620            | Recruiting             |
|                                                                                                                       |                         | N/A                                                        |             | II                        | NCT02549989            | Active, Not recruiting |

|                                                         |              |                                                    |      |             |                                                      |
|---------------------------------------------------------|--------------|----------------------------------------------------|------|-------------|------------------------------------------------------|
|                                                         | Sapanisertib | N/A                                                | II   | NCT02465060 | Recruiting                                           |
|                                                         |              | Paclitaxel                                         | II   | NCT03648489 | Recruiting                                           |
|                                                         |              | N/A                                                | II   | NCT03097328 | Recruiting                                           |
|                                                         |              | N/A                                                | II   | NCT02244463 | Recruiting                                           |
|                                                         | Apitolisib   | Abiraterone, prednisone                            | I/II | NCT01485861 | Recruiting                                           |
| Inhibits eukaryotic initiation factor-4A (eIF4a)        | Zotatifin    | N/A                                                | I/II | NCT04092673 | Recruiting                                           |
| Targeting MYC for proteasomal degradation               |              |                                                    |      |             |                                                      |
| Inhibitors of Polo-like kinase 1 (PLK1)                 | Onvansertib  | Abiraterone, prednisone                            | II   | NCT03414034 | Recruiting                                           |
|                                                         |              | Nanoliposomal irinotecan, leucovorin, fluorouracil | II   | NCT04752696 | Not yet recruiting                                   |
|                                                         |              | Bevacizumab, FOLFIRI                               | I/II | NCT03829410 | Recruiting                                           |
|                                                         |              | Cytarabine or decitabine                           | I/II | NCT03303339 | Active, Not recruiting                               |
|                                                         | CYC140       | N/A                                                | I    | NCT03884829 | Unknown, estimated completion data February 28, 2021 |
| Inhibitors of Aurora A kinase                           | Alisertib    | N/A                                                | II   | NCT02114229 | Recruiting                                           |
|                                                         |              | Paclitaxel                                         | II   | NCT02187991 | Active, Not recruiting                               |
|                                                         |              | N/A                                                | II   | NCT02293005 | Active, Not recruiting                               |
|                                                         |              | Pembrolizumab                                      | I/II | NCT04555837 | Recruiting                                           |
| Targeting MYC synthetic lethal interactions             |              |                                                    |      |             |                                                      |
| Inhibition of SUMO-activating enzyme 1/2 (SAE1/2)       | TAK-981      | N/A                                                | I/II | NCT03648372 | Recruiting                                           |
|                                                         |              | Pembrolizumab                                      | I/II | NCT04381650 | Recruiting                                           |
|                                                         |              | Rituximab                                          | I/II | NCT04074330 | Recruiting                                           |
|                                                         |              | Mezagitamab, Daratumumab, Hyaluronidase-fihj       | I/II | NCT04776018 | Not yet recruiting                                   |
| Inhibition of cyclin-dependent kinases 1/4/9 (CDK1/4/9) | Rivaciclib   | Acalabrutinib                                      | I/II | NCT04630756 | Recruiting                                           |
|                                                         |              | N/A                                                | I    | NCT03263637 | Recruiting                                           |
| Inhibition of cyclin-dependent kinase 4/6 (CDK4/6)      | Abemaciclib  | Endocrine therapy                                  | IV   | NCT04707196 | Recruiting                                           |
|                                                         | Palbociclib  | Letrozole                                          | IV   | NCT04137640 | Not yet recruiting                                   |
|                                                         |              | Endocrine therapy                                  | IV   | NCT03355157 | Recruiting                                           |

|                                                                   |              |                                              |      |                                                    |                        |
|-------------------------------------------------------------------|--------------|----------------------------------------------|------|----------------------------------------------------|------------------------|
|                                                                   |              | Endocrine therapy and eHealth support        | IV   | NCT03220178                                        | Recruiting             |
|                                                                   | Dalpiciclib  | Letrozole, anastrozole                       | III  | NCT03966898                                        | Recruiting             |
|                                                                   |              | Fulvestrant                                  | III  | NCT03927456                                        | Not yet recruiting     |
|                                                                   | Ribociclib   | N/A                                          | III  | NCT04055493                                        | Recruiting             |
|                                                                   |              | Endocrine therapy                            | III  | NCT03701334, NCT03905343, NCT03425838, NCT02344472 | Recruiting             |
|                                                                   |              | Letrozole, alpelisib, fulvestrant            | III  | NCT03439046                                        | Active, Not recruiting |
|                                                                   |              | Endocrine therapy, chemotherapy, bevacizumab | III  | NCT03462251                                        | Active, Not recruiting |
|                                                                   |              | Letrozole                                    | III  | NCT02941926                                        | Active, Not recruiting |
|                                                                   |              | Fulvestrant                                  | III  | NCT02422615                                        | Active, Not recruiting |
|                                                                   |              | Tamoxifen, letrozole, anastrozole, goserelin | III  | NCT02278120                                        | Active, Not recruiting |
|                                                                   |              | Letrozole                                    | III  | NCT01958021                                        | Active, Not recruiting |
|                                                                   | Trilaciclib  | Gemcitabine, carboplatin                     | III  | NCT04799249                                        | Not yet recruiting     |
|                                                                   |              | N/A                                          | III  | NCT04607668                                        | Recruiting             |
| Inhibition of cyclin-dependent kinase 7 (CDK7)                    | Samuraciclib | N/A                                          | I/II | NCT03363893                                        | Recruiting             |
|                                                                   | SY-5609      | Fulvestrant                                  | I    | NCT04247126                                        | Recruiting             |
| Inhibition of cyclin-dependent kinase 9 (CDK9)                    | Alvocidib    | Cytarabine                                   | II   | NCT03969420                                        | Active, Not recruiting |
|                                                                   |              | Decitabine, azacitidine                      | I/II | NCT03593915                                        | Active, Not recruiting |
|                                                                   | KB-0742      | N/A                                          | I    | NCT04718675                                        | Recruiting             |
|                                                                   | TP-1287      | N/A                                          | I    | NCT03604783                                        | Recruiting             |
| Inhibition of checkpoint kinase 1 (CHK1)                          | Prexasertib  | LY3023414                                    | II   | NCT04032080                                        | Recruiting             |
|                                                                   |              | Irinotecan, temozolomide                     | I/II | NCT04095221                                        | Recruiting             |
|                                                                   |              | N/A                                          | II   | NCT03414047, NCT02873975, NCT02203513              | Active, Not recruiting |
| Inhibition of ataxia telangiectasia and Rad3-related kinase (ATR) | Berzosertib  | Irinotecan                                   | II   | NCT03641313                                        | Recruiting             |
|                                                                   |              | Topotecan                                    | II   | NCT03896503                                        | Recruiting             |

|                                                                        |              |                                         |             |                                       |                        |
|------------------------------------------------------------------------|--------------|-----------------------------------------|-------------|---------------------------------------|------------------------|
|                                                                        |              | Carboplatin, gemcitabine, pembrolizumab | I/II        | NCT04216316                           | Recruiting             |
|                                                                        |              | Avelumab                                | I/II        | NCT04266912                           | Recruiting             |
|                                                                        |              | Topotecan                               | II          | NCT04768296                           | Not yet recruiting     |
|                                                                        |              | Gemcitabine                             | II          | NCT04807816                           | Not yet recruiting     |
|                                                                        |              | Lurbinectidin                           | I/II        | NCT04802174                           | Not yet recruiting     |
|                                                                        |              | Carboplatin, docetaxel                  | II          | NCT03517969                           | Active, Not recruiting |
|                                                                        |              | Gemcitabine                             | II          | NCT02595892                           | Active, Not recruiting |
|                                                                        |              | Cisplatin, gemcitabine                  | II          | NCT02567409                           | Active, Not recruiting |
|                                                                        |              | N/A                                     | II          | NCT03718091                           | Active, Not recruiting |
|                                                                        | Ceralasertib | N/A                                     | II          | NCT04564027                           | Active, Not recruiting |
|                                                                        |              | Acalabrutinib                           | II          | NCT03328273                           | Active, Not recruiting |
|                                                                        |              | Durvalumab                              | II          | NCT03780608                           | Active, Not recruiting |
|                                                                        |              | Olaparib                                | II          | NCT03330847, NCT02937818, NCT02576444 | Active, Not recruiting |
|                                                                        | M4344        | Niraparib                               | I/II        | NCT04655183                           | Not yet recruiting     |
|                                                                        | Elimusertib  | Pembrolizumab                           | I           | NCT04095273                           | Recruiting             |
|                                                                        |              | N/A                                     | I           | NCT03188965                           | Recruiting             |
|                                                                        |              | Radiotherapy, pembrolizumab             | I           | NCT04576091                           | Not yet recruiting     |
|                                                                        |              | Fluorouracil, irinotecan, leucovorin    | I           | NCT04535401                           | Not yet recruiting     |
|                                                                        |              | Gemcitabine                             | I           | NCT04616534                           | Not yet recruiting     |
|                                                                        |              | Gemcitabine, cisplatin                  | I           | NCT04491942                           | Not yet recruiting     |
| Irinotecan, topotecan                                                  |              | I                                       | NCT04514497 | Not yet recruiting                    |                        |
| Inhibition of protein kinase, DNA-activated, catalytic subunit (PRKDC) | Peposertib   | Radiation therapy                       | I/II        | NCT04172532                           | Recruiting             |
|                                                                        |              | Radiotherapy, avelumab                  | I/II        | NCT04071236, NCT04068194              | Recruiting             |
|                                                                        |              | Capecitabine, radiotherapy              | I/II        | NCT03770689                           | Recruiting             |
| Inhibition of myeloid leukaemia cell differentiation protein 1 (MCL1)  | ABBV-467     | N/A                                     | I           | NCT04178902                           | Recruiting             |
|                                                                        | AZD5991      | Venetoclax                              | I/II        | NCT03218683                           | Recruiting             |
|                                                                        | Tapotoclax   | N/A                                     | I           | NCT02675452                           | Recruiting             |

|  |         |             |      |             |                    |
|--|---------|-------------|------|-------------|--------------------|
|  | PRT1419 | N/A         | I    | NCT04543305 | Recruiting         |
|  | S64315  | Azacitidine | I    | NCT04629443 | Recruiting         |
|  |         | Venetoclax  | I    | NCT03672695 | Recruiting         |
|  |         | Azacitidine | I/II | NCT04629443 | Not yet recruiting |

<sup>a</sup>Trials registered at [www.clinicaltrials.gov](http://www.clinicaltrials.gov).

<sup>b</sup>Status information collated on 29 March 2021. For inhibitors that are investigated in multiple clinical trial phases, only the most advanced trials are listed.
